# Supplementary material for: RACGAP1 is transcriptionally regulated by E2F3, and its depletion leads to mitotic catastrophe in esophageal squamous cell carcinoma
Source: PubMed Central journal article supplement — Ann Transl Med. 2020 Aug;8(15):950. doi: 10.21037/atm-20-2901 (PMC7475413; doi:10.21037/atm-20-2901), 2020-08
Supplement: atm-08-15-950-dss.pdf [file atm-08-15-950-dss.pdf]

## Data Sharing Statement

|                     |                                                                                                                                                    |                                                                                                                                                                      |
|---------------------|----------------------------------------------------------------------------------------------------------------------------------------------------|----------------------------------------------------------------------------------------------------------------------------------------------------------------------|
| <b>Article Info</b> | <a href="http://dx.doi.org/10.21037/atm-20-2901">http://dx.doi.org/10.21037/atm-20-2901</a>                                                        |                                                                                                                                                                      |
| <b>Item</b>         | <b>Question</b>                                                                                                                                    | <b>Authors' Response<br/>(place “-” if not applicable)</b>                                                                                                           |
| 1                   | Would you like to share data collected for your study to others?                                                                                   | Yes.                                                                                                                                                                 |
| 2                   | If not, would you like to share the reason for your decision?                                                                                      | -                                                                                                                                                                    |
| 3                   | What data in particular will be shared?                                                                                                            | Individual participant data that underlie the results reported in this article, after deidentification.                                                              |
| 4                   | Any other documents will be share? Such as study protocol, statistical analysis plan, informed consent form, clinical study report, analytic code. | Yes.                                                                                                                                                                 |
| 5                   | When will data availability begin?                                                                                                                 | Beginning from 6 months following article publication.                                                                                                               |
| 6                   | When will data availability end?                                                                                                                   | Ending after 5 years following article publication.                                                                                                                  |
| 7                   | To whom will you share the data?                                                                                                                   | Researchers who provide a methodologically sound proposal.                                                                                                           |
| 8                   | For what type of analysis or purpose?                                                                                                              | To achieve aims in the approved proposal.                                                                                                                            |
| 9                   | How or where can the data/documents be obtained?                                                                                                   | Proposals should be directed to <a href="mailto:wfzhaod@163.com">wfzhaod@163.com</a> . To gain access, data requestors will be need to sign a data access agreement. |
| 10                  | Any other restrictions?                                                                                                                            | No.                                                                                                                                                                  |
